# Supplementary material
Source: Elsevier journal article supplement (https://www.sciencedirect.com/science/article/pii/S1885585714003296)
Supplement: mmc1 [file S1885585714003296:mmc1.pdf]

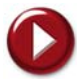

**Supplementary material**

---

Sex-related Impact on Clinical Outcome of Everolimus-eluting vs. Bare-metal Stents in ST-segment Myocardial Infarction. Insights From the EXAMINATION Trial

Ander Regueiro,<sup>a</sup> Diego Fernández-Rodríguez,<sup>a</sup> Salvatore Brugaletta,<sup>a</sup> Victoria Martín-Yuste,<sup>a</sup> Monica Masotti,<sup>a</sup> Xavier Freixa,<sup>a</sup> Ángel Cequier,<sup>b</sup> Andrés Íñiguez,<sup>c</sup> Patrick W. Serruys,<sup>d</sup> and Manel Sabaté,<sup>a,\*</sup> on behalf of the EXAMINATION Trial Investigators<sup>◇</sup>

<sup>a</sup>*Servicio de Cardiología, Hospital Clínic, IDIBAPS, Barcelona, Spain*

<sup>b</sup>*Área de Enfermedades del Corazón, Hospital Universitario de Bellvitge, IDIBELL, L'Hospitalet de Llobregat, Barcelona, Spain*

<sup>c</sup>*Servicio de Cardiología, Complejo Hospitalario Universitario de Vigo, Vigo, Pontevedra, Spain*

<sup>d</sup>*Thoraxcenter, Department of Cardiology, Erasmus Medical Center, Rotterdam, The Netherlands*

---

## **SUPPLEMENTARY MATERIAL**

### **Data Analysis**

#### **Interaction Assessment**

To test for interaction, we included an interaction term between treatment Group (EES vs BMS) and sex (Male vs Female) in the Cox model for each end point. If the  $P$  value of the interaction term was  $< .05$ , effect modification was considered to be present, and the interaction term was included as a covariate in the model.

Interaction between treatment group and sex was found in the following end points: All-cause death ( $P < .001$ ); any revascularization ( $P = .022$ ); target-lesion revascularization ( $P = .004$ ); target-vessel revascularization ( $P = .010$ ).

#### **Proportional Hazard Cox-models**

An exploratory univariate analysis between sex and treatment variables was performed. Cox regression analyses were performed for selected end points. Covariables with a  $p$ -value  $< 0.1$  were included in separate Cox-models for each end point. Interaction terms were included when appropriate. Cox-model was selected according to  $R^2$  and Akaike information criteria. Both were obtained with the macro UAB AllSetsReg using SPSS Statistics software. C-statistics were obtained using version 2.1 of the R statistical program (R Development Core Team).

Final models with discrimination measures are depicted below:

| End point                                                                                                 | Variables                                                               | AIC    | R <sup>2</sup> | C-Statistics |
|-----------------------------------------------------------------------------------------------------------|-------------------------------------------------------------------------|--------|----------------|--------------|
| <i>Primary end point<br/>(Death / MI /Any<br/>revascularization)</i>                                      | Treatment, Sex, Age, Hypertension,<br>Thrombectomy, ASA                 | 2427.9 | 0.004          | 0.589        |
| Death (All cause)                                                                                         | Treatment, Sex, Treatment*Sex, Age,<br>ASA, DAPT, Stent diameter        | 227.2  | 0.071          | 0.804        |
| Myocardial infarction                                                                                     | Treatment, Sex, DAPT, Smoking<br>Status, Clinical Status on Admission   | 275.1  | 0.007          | 0.695        |
| Any revascularization                                                                                     | Treatment, Sex, Treatment*Sex, Age,<br>DM, Hypertension, Stent diameter | 2189.2 | 0.004          | 0.605        |
| <i>Device-oriented endpoint<br/>(Cardiac death / TV MI /<br/>Clinically driven<br/>revascularization)</i> | Treatment, Sex, Age, ASA, Clinical<br>status on admission               | 1236.1 | 0.008          | 0.621        |
| <i>Target-lesion revascularization</i>                                                                    | Treatment, Sex, Treatment*Sex, Age,<br>DM, Smoking Status               | 711.0  | 0.009          | 0.668        |
| <i>Target-vessel revascularization</i>                                                                    | Treatment, Sex, Treatment*Sex, Age                                      | 1069.9 | 0.005          | 0.609        |
| <i>Nontarget-vessel<br/>revascularization</i>                                                             | Treatment, Sex, Age, DM, ASA                                            | 1310.9 | 0.005          | 0.624        |

ASA, acetylsalicylic acid; DM, diabetes mellitus; MI, myocardial infarction; TV, target vessel.
